# Supplementary material
Source: MDPI journal article supplement (https://www.mdpi.com/2079-9276/10/7/72)
Supplement: s1 [file s1]

# Tracking the fate of aluminium in the EU using the MaTrace model

Gabriela Jarrín Jacóme<sup>a</sup>, Jo Dewulf<sup>a</sup>, María Fernanda Godoy León<sup>a</sup>, Rodrigo Alvarenga<sup>a</sup>

<sup>a</sup> Research Group Sustainable Systems Engineering (STEN), Ghent University, Coupure Links  
653, 9000 Ghent, Belgium

## **SUPPLEMENTARY MATERIAL**

## 1. Nomenclature

The model considers  $n$  applications and  $n_R$  recycling process. Each recycling processes produces a different secondary material. Subscript  $i$  indicates the application,  $R$  the recycling process,  $t$  refers to the year of evaluation and  $j$  to the process ( $j$ : P, production, M, manufacturing, R, recycling, PT, pre-treatment).

|                  |                                                                                                           |
|------------------|-----------------------------------------------------------------------------------------------------------|
| $\beta$          | : Shape or slope parameter [-]                                                                            |
| $\kappa$         | : Scale parameter [year]                                                                                  |
| $\lambda$        | : Total production yield [-]                                                                              |
| $\lambda_j$      | : Production yield ( $j$ : P, processing; M, manufacturing, PT: pre-treatment, R: recycling) [-]          |
| $\xi_j$          | : Recovery of scrap during production yield ( $j$ : P, processing; M, manufacturing) [-]                  |
| $\varsigma$      | : Percentage of End-of-Life product categories collected for recycling (collection-to-recycling rate) [-] |
| $\vartheta$      | : Percentage of End-of-Service product categories hoarded by users during $p$ years [-]                   |
| $\psi_{EoL}$     | : Percentage of collected End-of-Life applications that are exported [-]                                  |
| $\psi_P$         | : Percentage of applications that are exported [-]                                                        |
| $B$              | : Allocation of material recovered from pre-treatment to the recycling processes [-]                      |
| $D$              | : Allocation of secondary material for production of new applications [dimensionless]                     |
| $E$              | : Weibull probability density function [years <sup>-1</sup> ]                                             |
| $L_a$            | : Aggregated losses [tonne]                                                                               |
| $L_T$            | : Total loss for the system [tonne]                                                                       |
| $\bar{L}_T$      | : Stock of losses [tonne]                                                                                 |
| $R_p$            | : Amount of hoarded End-of-Service applications that are released after $p$ years [tonne]                 |
| $\overline{R_p}$ | : Stock of released hoarded applications [tonne]                                                          |
| $t$              | : Time [years]                                                                                            |
| $t_H$            | : Hoarding time [years]                                                                                   |
| $t_L$            | : Lifetime [years]                                                                                        |
| $V$              | : Amount of EoL applications non-selectively disposed [tonne]                                             |
| $x$              | : Total amount of applications produced from secondary materials [tonne]                                  |
| $x_{EU}$         | : Mass of the material under consideration in final applications that stay in the region [tonne]          |
| $\bar{x}_{EU}$   | : Stock of applications [tonne]                                                                           |
| $z$              | : Mass of material that occurs in End-of-Service applications [tonne]                                     |

## 2. Initial distribution of Aluminium (Passarini et al., 2018)

Since the data was reported per sector and not per individual product category, the reported value per sector was divided by the number of product types analyzed in the sector. For instance, Passarini et al. (2018) indicated that 25% of the in-use sector in the EU correspond to building and construction. This sector consists of two product categories i.e., residential and non-residential buildings. Hence, each product type represents 12.5% of the in-use share (see Table 1). The same reasoning was applied to the rest of product types.

*Table S1. Initial distribution of aluminium among 12 product types in use in the EU in 2018 (Adapted from Passarini et al. (2018))*

| Sector                                | Initial distribution<br>in 2018 (per sector)<br>(wt%) | Product                               | Initial distribution in<br>2018 ( $x_{EU,i}(0)$ ) (wt%) |
|---------------------------------------|-------------------------------------------------------|---------------------------------------|---------------------------------------------------------|
| Transportation                        | 31.0                                                  | Automobiles                           | 10.3                                                    |
|                                       |                                                       | Aerospace                             | 10.3                                                    |
|                                       |                                                       | Other transport                       | 10.3                                                    |
| Building and<br>construction          | 25.0                                                  | Residential buildings                 | 12.5                                                    |
|                                       |                                                       | Non-residential buildings             | 12.5                                                    |
| Packaging and cans                    | 20.0                                                  | Used beverage cans                    | 10.0                                                    |
|                                       |                                                       | Mixed packaging                       | 10.0                                                    |
| Industrial machinery<br>and equipment | 3.0                                                   | Industrial machinery and<br>equipment | 3.0                                                     |
| Electrical engineering                | 10.0                                                  | Cables                                | 5.0                                                     |
|                                       |                                                       | Other engineering                     | 5.0                                                     |
| Consumer durables                     | 6.0                                                   | Consumer durables                     | 6.0                                                     |
| Others*                               | 5.0                                                   | Others*                               | 5.0                                                     |

### 3. Full data set and assumptions

Table S2. Full data set of the application automobiles. It includes the assumptions made and a distinction when the value was reported per sector

| Phase      | Parameter                      | Data country/region | Data year | Value | Unit | Reference                  | Value per sector | Assumptions                                                                                  |
|------------|--------------------------------|---------------------|-----------|-------|------|----------------------------|------------------|----------------------------------------------------------------------------------------------|
| Production | Processing yield               | EU                  | 2018      | 92    | %    | Passarini et al. (2018)    | YES              |                                                                                              |
|            |                                | Germany             | 2001      | 85    | %    | Rombach & Friedrich (2001) | YES              |                                                                                              |
|            | Manufacturing yield            | Global              | 2012      | 84    | %    | Liu et al. (2012)          | NO               |                                                                                              |
|            | Processing scrap recovery      | Germany             | 2001      | 94    | %    | Rombach & Friedrich (2001) | YES              |                                                                                              |
|            | Manufacturing scrap recovery   | EU                  | 2005      | 37    | %    | Boin & Bertram (2005)      | YES              | Obtained as the ratio of the scrap recovered from manufacturing to the total scrap generated |
|            | Processing downcycled scrap    | EU                  | 2005      | 0     | %    | Boin & Bertram (2005)      | YES              | The scrap generated is remelted in the same plant                                            |
|            | Manufacturing downcycled scrap | EU                  | 2005      | 0     | %    | Boin & Bertram (2005)      | YES              | The scrap generated is remelted in the same plant                                            |
|            | Export of products             | EU                  | 2019      | 12    | %    | Workman (2019)             | NO               |                                                                                              |
|            | Matrix D (cast alloys)         | Germany             | 2001      | 26.5  | %    | Rombach & Friedrich (2001) | YES              | Value reported per sector. Divided by the number of applications (3)                         |
|            | Matrix D (wrought alloys)      | Germany             | 2001      | 4.6   | %    | Rombach & Friedrich (2001) | YES              | Value reported per sector. Divided by the number of applications (3)                         |
| Use        | Initial material               | EU                  | 2018      | 10.33 | %    | Passarini et al. (2018)    | YES              | Reported value per sector (31%), divided among the 3 applications                            |
|            |                                | Japan               | 2008      | 10.2  | -    | Nomura & Momose (2008)     | NO               | Value for light duty vehicles for own use                                                    |
|            | Weibull scale parameter        | Japan               | 2008      | 9.7   | -    |                            | NO               | Value for compact vehicles for own se                                                        |
|            |                                | Japan               | 2008      | 10.2  | -    |                            | NO               | Value for ordinary passenger cars                                                            |
|            |                                | Japan               | 2008      | 19.4  | -    |                            | NO               | Value for other vehicles for own use                                                         |
|            |                                | Japan               | 2008      | 8.2   | -    |                            | NO               | Value for taxies                                                                             |
|            |                                | Japan               | 2008      | 10.8  | -    |                            | NO               | Value for light vehicles for freight                                                         |
|            |                                | Japan               | 2008      | 10.2  | -    |                            | NO               | Value for compact vehicles for freight                                                       |

| Phase       | Parameter                                     | Data country/region | Data year | Value | Unit  | Reference               | Value per sector | Assumptions                                                              |
|-------------|-----------------------------------------------|---------------------|-----------|-------|-------|-------------------------|------------------|--------------------------------------------------------------------------|
| End-of-life | Weibull shape parameter                       | Japan               | 2008      | 10.6  | -     | Nomura & Momose (2008)  | NO               | Value for ordinary passenger cars for freight                            |
|             |                                               | Japan               | 2008      | 1.6   | -     |                         | NO               |                                                                          |
|             |                                               | Japan               | 2008      | 1.75  | -     |                         | NO               | Value for light duty vehicles for own use                                |
|             |                                               | Japan               | 2008      | 1.63  | -     |                         | NO               | Value for compact vehicles for own se                                    |
|             |                                               | Japan               | 2008      | 2.31  | -     |                         | NO               | Value for ordinary passenger cars                                        |
|             |                                               | Japan               | 2008      | 1.84  | -     |                         | NO               | Value for other vehicles for own use                                     |
|             |                                               | Japan               | 2008      | 2.35  | -     |                         | NO               | Value for taxies                                                         |
|             |                                               | Japan               | 2008      | 2.86  | -     |                         | NO               | Value for light vehicles for freight                                     |
|             |                                               | Japan               | 2008      | 2.35  | -     |                         | NO               | Value for compact vehicles for freight                                   |
|             | Lifetime                                      | EU                  | 2017      | 15    | years | Bertram et al. (2017)   | NO               |                                                                          |
|             |                                               | Japan               | 2012      | 13    | years | Hatamaya et al. (2012)  | YES              |                                                                          |
|             | Hoarding rate                                 | Global              | 2000      | 25    | %     | Martchek (2006)         | YES              | Calculated as the difference of products collected at its end-of-life    |
|             |                                               | EU                  | 2018      | 10    | %     | EAA (2018)              | NO               | Calculated as the difference of products collected at its end-of-life    |
|             | Hoarding time                                 | US                  | 2015      | 5     | years | Maxfield (2008)         | NO               | Assumed value                                                            |
|             | Export of EoL products                        | EU                  | 2005      | 4.71  | %     | Boin & Bertram (2005)   | YES              | Calculated as ratio of exported scrap to total scrap generated in the EU |
|             |                                               | EU                  | 2017      | 4.33  | %     | Eurostat (2017)         | NO               | Calculated as ratio of ELV exported to total ELV in the EU               |
|             |                                               | EU                  | 2015      | 9.92  | %     | Huisman et al. (2017)   | NO               |                                                                          |
|             | Collection-to-recycling rate                  | EU                  | 2017      | 88    | %     | Eurostat (2017)         | NO               |                                                                          |
|             | Pre-treatment efficiency                      | Global              | 2012      | 97    | %     | Liu et al. (2012)       | NO               |                                                                          |
|             |                                               | EU                  | 2017      | 98    | %     | Bertram et al. (2017)   | YES              |                                                                          |
|             | Matrix B (refining)                           | EU                  | 2005      | 95.5  | %     | Boin & Bertram (2005)   | NO               |                                                                          |
|             | Matrix B (remelting)                          | EU                  | 2005      | 4.5   | %     | Boin & Bertram (2005)   | NO               |                                                                          |
|             | Recycling efficiency (remelting and refining) | EU                  | 2018      | 97    | %     | Passarini et al. (2018) | YES              |                                                                          |

Table S3. Full data set of the application aerospace. It includes the assumptions made and a distinction when the value was reported per sector

| Phase      | Parameter                      | Data country/region | Data year | Value | Unit  | Reference                  | Value per sector | Assumptions                                                                                  |
|------------|--------------------------------|---------------------|-----------|-------|-------|----------------------------|------------------|----------------------------------------------------------------------------------------------|
| Production | Processing yield               | EU                  | 2018      | 92    | %     | Passarini et al. (2018)    | YES              |                                                                                              |
|            |                                | Germany             | 2001      | 85    | %     | Rombach & Friedrich (2001) | YES              |                                                                                              |
|            | Manufacturing yield            | Global              | 2012      | 60    | %     | Liu et al. (2012)          | NO               |                                                                                              |
|            | Processing scrap recovery      | Germany             | 2001      | 94    | %     | Rombach & Friedrich (2001) | YES              |                                                                                              |
|            | Manufacturing scrap recovery   | EU                  | 2005      | 37    | %     | Boin & Bertram (2005)      | YES              | Obtained as the ratio of the scrap recovered from manufacturing to the total scrap generated |
|            | Processing downcycled scrap    | EU                  | 2005      | 0     | %     | Boin & Bertram (2005)      | YES              | The scrap generated is remelted in the same plant                                            |
|            | Manufacturing downcycled scrap | EU                  | 2005      | 0     | %     | Boin & Bertram (2005)      | YES              | The scrap generated is remelted in the same plant                                            |
|            | Export of products             | EU                  | 2019      | 2     | %     | Workman (2019)             | NO               |                                                                                              |
|            | Matrix D (cast alloys)         | Germany             | 2001      | 26.5  | %     | Rombach & Friedrich (2001) | YES              | Value reported per sector. Divided by the number of applications (3)                         |
|            | Matrix D (wrought alloys)      | Germany             | 2001      | 4.6   | %     | Rombach & Friedrich (2001) | YES              | Value reported per sector. Divided by the number of applications (3)                         |
| Use        | Initial material               | EU                  | 2018      | 10.33 | %     | Passarini et al. (2018)    | YES              | Reported value per sector (31%), divided among the 3 applications                            |
|            | Weibull scale parameter        | Japan               | 2008      | 6.8   | -     | Nomura & Momose (2008)     | NO               | Value reported for aircraft and helicopters                                                  |
|            | Weibull shape parameter        | Japan               | 2008      | 2.00  | -     | Nomura & Momose (2008)     | NO               | Value reported for aircraft and helicopters                                                  |
|            | Lifetime                       | EU                  | 2017      | 40    | years | Bertram et al. (2017)      | NO               |                                                                                              |
|            |                                | Japan               | 2012      | 13    | years | Hatamaya et al. (2012)     | YES              |                                                                                              |

| Phase       | Parameter                                     | Data country/region | Data year | Value | Unit  | Reference               | Value per sector | Assumptions                                                              |
|-------------|-----------------------------------------------|---------------------|-----------|-------|-------|-------------------------|------------------|--------------------------------------------------------------------------|
| End-of-life | Hoarding rate                                 | Global              | 2000      | 25    | %     | Martchek (2006)         | YES              | Calculated as the difference of products collected at its end-of-life    |
|             | Hoarding time                                 | US                  | 2015      | 5     | years | Maxfield (2008)         | NO               | Assumed value, considered the same as automobiles                        |
|             | Export of EoL products                        | EU                  | 2005      | 4.71  | %     | Boin & Bertram (2005)   | YES              | Calculated as ratio of exported scrap to total scrap generated in the EU |
|             | Collection-to-recycling rate                  | EU                  | 2011      | 80    | %     | EC (2011)               | NO               |                                                                          |
|             | Pre-treatment efficiency                      | Global              | 2012      | 100   | %     | Liu et al. (2012)       | NO               |                                                                          |
|             |                                               | EU                  | 2017      | 98    | %     | Bertram et al. (2017)   | YES              |                                                                          |
|             | Matrix B (refining)                           | EU                  | 2005      | 50.8  | %     | Boin & Bertram (2005)   | NO               |                                                                          |
|             | Matrix B (remelting)                          | EU                  | 2005      | 49.2  | %     | Boin & Bertram (2005)   | NO               |                                                                          |
|             | Recycling efficiency (remelting and refining) | EU                  | 2018      | 97    | %     | Passarini et al. (2018) | YES              |                                                                          |

Table S4. Full data set of the application other transport. It includes the assumptions made and a distinction when the value was reported per sector

| Phase      | Parameter                 | Data country/region | Data year | Value | Unit | Reference                  | Value per sector | Assumptions |
|------------|---------------------------|---------------------|-----------|-------|------|----------------------------|------------------|-------------|
| Production | Processing yield          | EU                  | 2018      | 92    | %    | Passarini et al. (2018)    | YES              |             |
|            |                           | Germany             | 2001      | 85    | %    | Rombach & Friedrich (2001) | YES              |             |
|            | Manufacturing yield       | Global              | 2012      | 80    | %    | Liu et al. (2012)          | NO               |             |
|            | Processing scrap recovery | Germany             | 2001      | 94    | %    | Rombach & Friedrich (2001) | YES              |             |

| Phase | Parameter                      | Data country/region | Data year | Value | Unit | Reference                  | Value per sector | Assumptions                                                                                  |
|-------|--------------------------------|---------------------|-----------|-------|------|----------------------------|------------------|----------------------------------------------------------------------------------------------|
|       | Manufacturing scrap recovery   | EU                  | 2005      | 37    | %    | Boin & Bertram (2005)      | YES              | Obtained as the ratio of the scrap recovered from manufacturing to the total scrap generated |
|       | Processing downcycled scrap    | EU                  | 2005      | 0     | %    | Boin & Bertram (2005)      | YES              | The scrap generated is remelted in the same plant                                            |
|       | Manufacturing downcycled scrap | EU                  | 2005      | 0     | %    | Boin & Bertram (2005)      | YES              | The scrap generated is remelted in the same plant                                            |
|       | Export of products             | EU                  | 2019      | 12    | %    | Workman (2019)             | NO               |                                                                                              |
|       | Matrix D (cast alloys)         | Germany             | 2001      | 26.5  | %    | Rombach & Friedrich (2001) | YES              | Value reported per sector. Divided by the number of applications (3)                         |
|       | Matrix D (wrought alloys)      | Germany             | 2001      | 4.6   | %    | Rombach & Friedrich (2001) | YES              | Value reported per sector. Divided by the number of applications (3)                         |
| Use   | Initial material               | EU                  | 2018      | 10.33 | %    | Passarini et al. (2018)    | YES              | Reported value per sector (31%), divided among the 3 applications                            |
|       |                                | Japan               | 2008      | 14.9  | -    | Nomura & Momose (2008)     | NO               | Value for small-size bus for own use                                                         |
|       |                                | Japan               | 2008      | 18.1  | -    |                            | NO               | Value for motor coaches for own use                                                          |
|       |                                | Japan               | 2008      | 12.3  | -    |                            | NO               | Value for trucks (light-duty cars) for own use                                               |
|       |                                | Japan               | 2008      | 11.9  | -    |                            | NO               | Value for trucks (small cars) for own use                                                    |
|       |                                | Japan               | 2008      | 11.6  | -    |                            | NO               | Value for trucks (ordinary vehicles) for own use                                             |
|       | Weibull scale parameter        | Japan               | 2008      | 18.4  | -    |                            | NO               | Value for small-size busses for passengers                                                   |
|       |                                | Japan               | 2008      | 18.1  | -    |                            | NO               | Value for motor coaches for passengers                                                       |
|       |                                | Japan               | 2008      | 13.5  | -    |                            | NO               | Value for trucks (light-duty cars) for freight                                               |
|       |                                | Japan               | 2008      | 13.2  | -    |                            | NO               | Value for trucks (small gas-powered cars) for freight                                        |
|       |                                | Japan               | 2008      | 12.8  | -    |                            | NO               | Value for trucks (small diesel cars) for freight                                             |
|       |                                | Japan               | 2008      | 12.3  | -    |                            | NO               | Value for trucks (ordinary gas-powered cars) for freight                                     |



| Phase         | Parameter               | Data country/region | Data year | Value | Unit             | Reference              | Value per sector                                  | Assumptions                                              |     |                                                    |
|---------------|-------------------------|---------------------|-----------|-------|------------------|------------------------|---------------------------------------------------|----------------------------------------------------------|-----|----------------------------------------------------|
|               | Weibull shape parameter | Japan               | 2008      | 12.4  | -                | Nomura & Momose (2008) | NO                                                | Value for trucks (ordinary diesel cars) for freight      |     |                                                    |
|               |                         | Japan               | 2008      | 13.3  | -                |                        | NO                                                | Value for trucks (tractors) for freight                  |     |                                                    |
|               |                         | Japan               | 2008      | 19.9  | -                |                        | NO                                                | Value for platform trucks, including trailers            |     |                                                    |
|               |                         | Japan               | 2008      | 19.2  | -                |                        | NO                                                | Value for other industrial trucks                        |     |                                                    |
|               |                         | Japan               | 2008      | 3.07  | -                |                        | NO                                                | Value for small-size bus for own use                     |     |                                                    |
|               |                         | Japan               | 2008      | 2.37  | -                |                        | NO                                                | Value for motor coaches for own use                      |     |                                                    |
|               |                         | Japan               | 2008      | 3.07  | -                |                        | NO                                                | Value for trucks (light-duty cars) for own use           |     |                                                    |
|               |                         | Japan               | 2008      | 1.77  | -                |                        | NO                                                | Value for trucks (small cars) for own use                |     |                                                    |
|               |                         | Japan               | 2008      | 1.95  | -                |                        | NO                                                | Value for trucks (ordinary vehicles) for own use         |     |                                                    |
|               |                         | Japan               | 2008      | 3.14  | -                |                        | NO                                                | Value for small-size busses for passengers               |     |                                                    |
|               |                         | Japan               | 2008      | 3.51  | -                |                        | NO                                                | Value for motor coaches for passengers                   |     |                                                    |
|               |                         | Japan               | 2008      | 2.4   | -                |                        | NO                                                | Value for trucks (light-duty cars) for freight           |     |                                                    |
|               |                         | Japan               | 2008      | 2     | -                |                        | NO                                                | Value for trucks (small gas-powered cars) for freight    |     |                                                    |
|               |                         | Japan               | 2008      | 1.93  | -                |                        | NO                                                | Value for trucks (small diesel cars) for freight         |     |                                                    |
|               |                         | Japan               | 2008      | 2.15  | -                |                        | NO                                                | Value for trucks (ordinary gas-powered cars) for freight |     |                                                    |
|               |                         | Japan               | 2008      | 3.03  | -                |                        | NO                                                | Value for trucks (ordinary diesel cars) for freight      |     |                                                    |
|               |                         | Japan               | 2008      | 2.23  | -                |                        | NO                                                | Value for trucks (tractors) for freight                  |     |                                                    |
|               |                         | Japan               | 2008      | 2.01  | -                |                        | NO                                                | Value for platform trucks, including trailers            |     |                                                    |
|               |                         | Japan               | 2008      | 2.31  | -                |                        | NO                                                | Value for other industrial trucks                        |     |                                                    |
|               |                         | Japan               | 2008      | 2.3   | -                |                        | NO                                                | Value for small-size bus for own use                     |     |                                                    |
|               |                         | Lifetime            | EU        | 2017  | 30               |                        | years                                             | Bertram et al. (2017)                                    | NO  |                                                    |
|               |                         |                     | Japan     | 2012  | 13               |                        | years                                             | Hatamaya et al. (2012)                                   | YES |                                                    |
|               |                         | Hoarding rate       | Global    | 2000  | 17               |                        | %                                                 | -                                                        |     | Proxy value taken from the application automobiles |
| Hoarding time | US                      | 2015                | 5         | years | (Maxfield, 2008) | NO                     | Assumed value, considered the same as automobiles |                                                          |     |                                                    |

| Phase       | Parameter                                     | Data country/region | Data year | Value | Unit | Reference               | Value per sector | Assumptions                                                              |
|-------------|-----------------------------------------------|---------------------|-----------|-------|------|-------------------------|------------------|--------------------------------------------------------------------------|
| End-of-life | Export of EoL products                        | EU                  | 2005      | 4.71  | %    | Boin & Bertram (2005)   | YES              | Calculated as ratio of exported scrap to total scrap generated in the EU |
|             | Collection-to-recycling rate                  | EU                  | 2011      | 88    | %    | -                       | NO               | Proxy value taken from the application automobiles                       |
|             | Pre-treatment efficiency                      | Global              | 2012      | 100   | %    | Liu et al. (2012)       | NO               |                                                                          |
|             |                                               | EU                  | 2017      | 98    | %    | Bertram et al. (2017)   | YES              |                                                                          |
|             | Matrix B (refining)                           | EU                  | 2005      | 50.8  | %    | Boin & Bertram (2005)   | NO               |                                                                          |
|             | Matrix B (remelting)                          | EU                  | 2005      | 49.2  | %    | Boin & Bertram (2005)   | NO               |                                                                          |
|             | Recycling efficiency (remelting and refining) | EU                  | 2018      | 97    | %    | Passarini et al. (2018) | YES              |                                                                          |

Table S5. Full data set of the application residential buildings. It includes the assumptions made and a distinction when the value was reported per sector

| Phase      | Parameter                      | Data country/region | Data year | Value | Unit | Reference                  | Value per sector | Assumptions                                                                                  |
|------------|--------------------------------|---------------------|-----------|-------|------|----------------------------|------------------|----------------------------------------------------------------------------------------------|
| Production | Processing yield               | EU                  | 2018      | 95    | %    | Passarini et al. (2018)    | YES              |                                                                                              |
|            |                                | Germany             | 2001      | 95    | %    | Rombach & Friedrich (2001) | YES              |                                                                                              |
|            | Manufacturing yield            | Global              | 2012      | 90    | %    | Liu et al. (2012)          | NO               |                                                                                              |
|            | Processing scrap recovery      | Germany             | 2001      | 97    | %    | Rombach & Friedrich (2001) | YES              |                                                                                              |
|            | Manufacturing scrap recovery   | EU                  | 2005      | 17    | %    | Boin & Bertram (2005)      | YES              | Obtained as the ratio of the scrap recovered from manufacturing to the total scrap generated |
|            | Processing downcycled scrap    | EU                  | 2005      | 0     | %    | Boin & Bertram (2005)      | YES              | The scrap generated is remelted in the same plant                                            |
|            | Manufacturing downcycled scrap | EU                  | 2005      | 0     | %    | Boin & Bertram (2005)      | YES              | The scrap generated is remelted in the same plant                                            |

| Phase       | Parameter                                     | Data country/region | Data year | Value | Unit  | Reference                             | Value per sector | Assumptions                                                              |
|-------------|-----------------------------------------------|---------------------|-----------|-------|-------|---------------------------------------|------------------|--------------------------------------------------------------------------|
| Use         | Export of products                            | EU                  | 2019      | 0     | %     | Workman (2019)                        | NO               |                                                                          |
|             | Matrix D (cast alloys)                        | Germany             | 2001      | 10    | %     | Rombach & Friedrich (2001)            | YES              | Value reported per sector. Divided by the number of applications (2)     |
|             | Matrix D (wrought alloys)                     | Germany             | 2001      | 18.2  | %     | Rombach & Friedrich (2001)            | YES              | Value reported per sector. Divided by the number of applications (2)     |
|             | Initial material                              | EU                  | 2018      | 12.5  | %     | Passarini et al. (2018)               | YES              | Reported value per sector (25%), divided among the 2 applications        |
|             | Weibull scale parameter                       | Japan               | 2008      | 38.7  | -     | Nomura & Momose (2008)                | NO               | Value from housing                                                       |
|             |                                               | Japan               | 2008      | 36.4  | -     |                                       | NO               | Value from complex housing                                               |
|             |                                               | Japan               | 2008      | 30.9  | -     |                                       | NO               | Value from warehouses                                                    |
|             |                                               | Japan               | 2008      | 6.2   | -     |                                       | NO               | Value from model houses/rooms                                            |
|             | Weibull shape parameter                       | Japan               | 2008      | 2..25 | -     | Nomura & Momose (2008)                | NO               | Value from housing                                                       |
|             |                                               | Japan               | 2008      | 2.73  | -     |                                       | NO               | Value from complex housing                                               |
|             |                                               | Japan               | 2008      | 1.94  | -     |                                       | NO               | Value from warehouses                                                    |
|             |                                               | Japan               | 2008      | 1.66  | -     |                                       | NO               | Value from model houses/rooms                                            |
|             | Lifetime                                      | EU                  | 2017      | 60    | years | Bertram et al. (2017)                 | NO               |                                                                          |
|             |                                               | Japan               | 2012      | 31.5  | years | Hatamaya et al. (2012)                | YES              |                                                                          |
| End-of-life | Hoarding rate                                 | EU                  | 2004      | 5     | %     | Delft University of Technology (2004) | YES              | Calculated as the difference of products collected at its end-of-life    |
|             | Hoarding time                                 | UK                  | 2014      | 30    | years | The Guardian (2014)                   | NO               | Assumed value Report abandoned buildings up to 30 years                  |
|             | Export of EoL products                        | EU                  | 2005      | 4.71  | %     | Boin & Bertram (2005)                 | YES              | Calculated as ratio of exported scrap to total scrap generated in the EU |
|             | Collection-to-recycling rate                  | EU                  | 2006      | 89    | %     | EAA (2006)                            | YES              |                                                                          |
|             | Pre-treatment efficiency                      | Global              | 2012      | 100   | %     | Liu et al. (2012)                     | YES              |                                                                          |
|             |                                               | EU                  | 2017      | 98    | %     | Bertram et al. (2017)                 | YES              |                                                                          |
|             | Matrix B (refining)                           | EU                  | 2005      | 50.8  | %     | Boin & Bertram (2005)                 | NO               |                                                                          |
|             | Matrix B (remelting)                          | EU                  | 2005      | 49.2  | %     | Boin & Bertram (2005)                 | NO               |                                                                          |
|             | Recycling efficiency (remelting and refining) | EU                  | 2018      | 97    | %     | Passarini et al. (2018)               | YES              |                                                                          |

Table S6. Full data set of the application non-residential buildings. It includes the assumptions made and a distinction when the value was reported per sector

| Phase      | Parameter                      | Data country/region | Data year | Value | Unit  | Reference                  | Value per sector | Assumptions                                                                                  |
|------------|--------------------------------|---------------------|-----------|-------|-------|----------------------------|------------------|----------------------------------------------------------------------------------------------|
| Production | Processing yield               | EU                  | 2018      | 95    | %     | Passarini et al. (2018)    | YES              |                                                                                              |
|            |                                | Germany             | 2001      | 95    | %     | Rombach & Friedrich (2001) | YES              |                                                                                              |
|            | Manufacturing yield            | Global              | 2012      | 90    | %     | Liu et al. (2012)          | NO               |                                                                                              |
|            | Processing scrap recovery      | Germany             | 2001      | 97    | %     | Rombach & Friedrich (2001) | YES              |                                                                                              |
|            | Manufacturing scrap recovery   | EU                  | 2005      | 17    | %     | Boin & Bertram (2005)      | YES              | Obtained as the ratio of the scrap recovered from manufacturing to the total scrap generated |
|            | Processing downcycled scrap    | EU                  | 2005      | 0     | %     | Boin & Bertram (2005)      | YES              | The scrap generated is remelted in the same plant                                            |
|            | Manufacturing downcycled scrap | EU                  | 2005      | 0     | %     | Boin & Bertram (2005)      | YES              | The scrap generated is remelted in the same plant                                            |
|            | Export of products             | EU                  | 2019      | 0     | %     | Workman (2019)             | NO               |                                                                                              |
|            | Matrix D (cast alloys)         | Germany             | 2001      | 10    | %     | Rombach & Friedrich (2001) | YES              | Value reported per sector. Divided by the number of applications (2)                         |
|            | Matrix D (wrought alloys)      | Germany             | 2001      | 18.2  | %     | Rombach & Friedrich (2001) | YES              | Value reported per sector. Divided by the number of applications (2)                         |
| Use        | Initial material               | EU                  | 2018      | 12.5  | %     | Passarini et al. (2018)    | YES              | Reported value per sector (25%), divided among the 2 applications                            |
|            | Weibull scale parameter        | Japan               | 2008      | 35.4  | -     | Nomura & Momose (2008)     | NO               | Value taken from office buildings                                                            |
|            |                                | Japan               | 2008      | 23.3  | -     |                            | NO               | Value taken from other buildings                                                             |
|            | Weibull shape parameter        | Japan               | 2008      | 1.6   | -     | Nomura & Momose (2008)     | NO               | Value taken from office buildings                                                            |
|            |                                | Japan               | 2008      | 1.8   | -     |                            | NO               | Value taken from other buildings                                                             |
|            | Lifetime                       | EU                  | 2017      | 60    | years | Bertram et al. (2017)      | NO               |                                                                                              |
|            |                                | Japan               | 2012      | 31.5  | years | Hatamaya et al. (2012)     | YES              |                                                                                              |

| Phase       | Parameter                                     | Data country/region | Data year | Value | Unit  | Reference                             | Value per sector | Assumptions                                                              |
|-------------|-----------------------------------------------|---------------------|-----------|-------|-------|---------------------------------------|------------------|--------------------------------------------------------------------------|
| End-of-life | Hoarding rate                                 | EU                  | 2004      | 5     | %     | Delft University of Technology (2004) | YES              | Calculated as the difference of products collected at its end-of-life    |
|             | Hoarding time                                 | UK                  | 2014      | 30    | years | The Guardian (2014)                   |                  | Assumed value – same value as residential buildings                      |
|             | Export of EoL products                        | EU                  | 2005      | 4.71  | %     | Boin & Bertram (2005)                 | YES              | Calculated as ratio of exported scrap to total scrap generated in the EU |
|             | Collection-to-recycling rate                  | EU                  | 2006      | 89    | %     | EAA (2006)                            | YES              |                                                                          |
|             | Pre-treatment efficiency                      | Global              | 2012      | 100   | %     | Liu et al. (2012)                     | NO               |                                                                          |
|             |                                               | EU                  | 2017      | 98    | %     | Bertram et al. (2017)                 | YES              |                                                                          |
|             | Matrix B (refining)                           | EU                  | 2005      | 50.8  | %     | Boin & Bertram (2005)                 | YES              |                                                                          |
|             | Matrix B (remelting)                          | EU                  | 2005      | 49.2  | %     | Boin & Bertram (2005)                 | NO               |                                                                          |
|             | Recycling efficiency (remelting and refining) | EU                  | 2018      | 97    | %     | Passarini et al. (2018)               | YES              |                                                                          |

Table S7. Full data set of the application used beverage cans. It includes the assumptions made and a distinction when the value was reported per sector

| Phase      | Parameter                      | Data country/region | Data year | Value | Unit  | Reference                  | Value per sector | Assumptions                                                                                  |
|------------|--------------------------------|---------------------|-----------|-------|-------|----------------------------|------------------|----------------------------------------------------------------------------------------------|
| Production | Processing yield               | EU                  | 2018      | 59    | %     | Passarini et al. (2018)    | YES              |                                                                                              |
|            |                                | Germany             | 2001      | 75    | %     | Rombach & Friedrich (2001) | YES              |                                                                                              |
|            | Manufacturing yield            | Global              | 2012      | 75    | %     | Liu et al. (2012)          | NO               |                                                                                              |
|            | Processing scrap recovery      | Germany             | 2001      | 85    | %     | Rombach & Friedrich (2001) | YES              |                                                                                              |
|            | Manufacturing scrap recovery   | EU                  | 2005      | 12    | %     | Boin & Bertram (2005)      | YES              | Obtained as the ratio of the scrap recovered from manufacturing to the total scrap generated |
|            | Processing downcycled scrap    | EU                  | 2005      | 0     | %     | Boin & Bertram (2005)      | YES              | The scrap generated is remelted in the same plant                                            |
|            | Manufacturing downcycled scrap | EU                  | 2005      | 0     | %     | Boin & Bertram (2005)      | YES              | The scrap generated is remelted in the same plant                                            |
|            | Export of products             | EU                  | 2019      | 0     | %     | Workman (2019)             | NO               |                                                                                              |
|            | Matrix D (cast alloys)         | Germany             | 2001      | 0     | %     | Rombach & Friedrich (2001) | YES              | Value reported per sector. Divided by the number of applications (3)                         |
|            | Matrix D (wrought alloys)      | Germany             | 2001      | 6.9   | %     | Rombach & Friedrich (2001) | YES              | Value reported per sector. Divided by the number of applications (3)                         |
| Use        | Initial material               | EU                  | 2018      | 10    | %     | Passarini et al. (2018)    | YES              | Reported value per sector (31%), divided among the 3 applications                            |
|            | Weibull scale parameter        | Japan               | 2008      | 15.5  | -     | Nomura & Momose (2008)     | NO               | Assumed value                                                                                |
|            | Weibull shape parameter        | Japan               | 2008      | 1.42  | -     | Nomura & Momose (2008)     | NO               | Assumed value                                                                                |
|            | Lifetime                       | EU                  | 2017      | 1     | years | Bertram et al. (2017)      | NO               |                                                                                              |
|            | Hoarding rate                  | EU                  | 2016      | 33    | %     | Niero & Olsen (2016)       | YES              | Calculated as the difference of products collected at its end-of-life                        |

| Phase       | Parameter                                     | Data country/region | Data year | Value          | Unit        | Reference                 | Value per sector | Assumptions                                                              |
|-------------|-----------------------------------------------|---------------------|-----------|----------------|-------------|---------------------------|------------------|--------------------------------------------------------------------------|
|             | Hoarding time                                 | EU                  | 2019      | 3              | years       | Packaging insights (2019) | YES              | Assumed value                                                            |
|             | Export of EoL products                        | EU                  | 2005      | 0              | %           | Boin & Bertram (2005)     | YES              | Calculated as ratio of exported scrap to total scrap generated in the EU |
|             | Collection-to-recycling rate                  | EU                  | 2016      | 55<br>65<br>75 | %<br>%<br>% | Niero & Olsen (2016)      | NO               |                                                                          |
|             | Pre-treatment efficiency                      | Global              | 2012      | 99             | %           | Liu et al. (2012)         | YES              |                                                                          |
|             |                                               | EU                  | 2017      | 98             | %           | Bertram et al. (2017)     | YES              |                                                                          |
| End-of-life | Matrix B (refining)                           | EU                  | 2005      | 20             | %           | Boin & Bertram (2005)     | NO               |                                                                          |
|             | Matrix B (remelting)                          | EU                  | 2005      | 80             | %           | Boin & Bertram (2005)     | NO               |                                                                          |
|             | Recycling efficiency (remelting and refining) | EU                  | 2018      | 97             | %           | Passarini et al. (2018)   | YES              |                                                                          |

Table S8. Full data set of the application mixed packaging. It includes the assumptions made and a distinction when the value was reported per sector

| Phase      | Parameter                    | Data country/region | Data year | Value | Unit | Reference                  | Value per sector | Assumptions                                                                                  |
|------------|------------------------------|---------------------|-----------|-------|------|----------------------------|------------------|----------------------------------------------------------------------------------------------|
|            |                              | EU                  | 2018      | 59    | %    | Passarini et al. (2018)    | YES              |                                                                                              |
|            | Processing yield             | Germany             | 2001      | 75    | %    | Rombach & Friedrich (2001) | YES              |                                                                                              |
|            | Manufacturing yield          | Global              | 2012      | 75    | %    | Liu et al. (2012)          | NO               |                                                                                              |
| Production | Processing scrap recovery    | Germany             | 2001      | 85    | %    | Rombach & Friedrich (2001) | YES              |                                                                                              |
|            | Manufacturing scrap recovery | EU                  | 2005      | 12    | %    | Boin & Bertram (2005)      | YES              | Obtained as the ratio of the scrap recovered from manufacturing to the total scrap generated |

| Phase       | Parameter                      | Data country/region | Data year | Value | Unit  | Reference                  | Value per sector | Assumptions                                                              |
|-------------|--------------------------------|---------------------|-----------|-------|-------|----------------------------|------------------|--------------------------------------------------------------------------|
|             | Processing downcycled scrap    | EU                  | 2005      | 0     | %     | Boin & Bertram (2005)      | YES              | The scrap generated is remelted in the same plant                        |
|             | Manufacturing downcycled scrap | EU                  | 2005      | 0     | %     | Boin & Bertram (2005)      | YES              | The scrap generated is remelted in the same plant                        |
|             | Export of products             | EU                  | 2019      | 0     | %     | Workman (2019)             | NO               |                                                                          |
|             | Matrix D (cast alloys)         | Germany             | 2001      | 0     | %     | Rombach & Friedrich (2001) | YES              | Value reported per sector. Divided by the number of applications (2)     |
|             | Matrix D (wrought alloys)      | Germany             | 2001      | 6.9   | %     | Rombach & Friedrich (2001) | YES              | Value reported per sector. Divided by the number of applications (2)     |
| Use         | Initial material               | EU                  | 2018      | 10    | %     | Passarini et al. (2018)    | YES              | Reported value per sector (20%), divided among the 2 applications        |
|             | Weibull scale parameter        | Japan               | 2008      | 15.5  | -     | Nomura & Momose (2008)     | NO               | Average proxy value taken from application other and metallic containers |
|             | Weibull shape parameter        | Japan               | 2008      | 1.42  | -     | Nomura & Momose (2008)     | NO               | Average proxy value taken from application other and metallic containers |
|             | Lifetime                       | EU                  | 2017      | 1     | years | Bertram et al. (2017)      | NO               |                                                                          |
|             | Hoarding rate                  | EU                  | 2016      | 29    | %     | Niero & Olsen (2016)       | YES              | Calculated as the difference of products collected at its end-of-life    |
|             | Hoarding time                  | EU                  | 2019      | 3     | years | Packaging insights (2019)  | YES              | Assumed value                                                            |
| End-of-life | Export of EoL products         | EU                  | 2005      | 0     | %     | Boin & Bertram (2005)      | YES              | Calculated as ratio of exported scrap to total scrap generated in the EU |
|             | Collection-to-recycling rate   | EU                  | 2016      | 55    | %     | Niero & Olsen (2016)       | NO               |                                                                          |
|             |                                |                     |           | 65    | %     |                            |                  |                                                                          |
|             |                                |                     |           | 75    | %     |                            |                  |                                                                          |
|             | Pre-treatment efficiency       | Global              | 2012      | 99    | %     | Liu et al. (2012)          | YES              |                                                                          |
|             |                                | EU                  | 2017      | 98    | %     | Bertram et al. (2017)      | YES              |                                                                          |
|             | Matrix B (refining)            | EU                  | 2005      | 20    | %     | Boin & Bertram (2005)      | NO               |                                                                          |
|             | Matrix B (remelting)           | EU                  | 2005      | 80    | %     | Boin & Bertram (2005)      | NO               |                                                                          |
|             | Recycling efficiency           | EU                  | 2018      | 97    | %     | Passarini et al. (2018)    | YES              |                                                                          |



| Phase | Parameter                | Data country/region | Data year | Value | Unit | Reference | Value per sector | Assumptions |
|-------|--------------------------|---------------------|-----------|-------|------|-----------|------------------|-------------|
|       | (remelting and refining) |                     |           |       |      |           |                  |             |

Table S9. Full data set of the application machinery and equipment. It includes the assumptions made and a distinction when the value was reported per sector

| Phase      | Parameter                      | Data country/region | Data year | Value | Unit | Reference                  | Value per sector | Assumptions                                                                                  |
|------------|--------------------------------|---------------------|-----------|-------|------|----------------------------|------------------|----------------------------------------------------------------------------------------------|
| Production | Processing yield               | EU                  | 2018      | 80    | %    | Passarini et al. (2018)    | YES              |                                                                                              |
|            |                                | Germany             | 2001      | 95    | %    | Rombach & Friedrich (2001) | YES              |                                                                                              |
|            | Manufacturing yield            | Global              | 2012      | 75    | %    | Liu et al. (2012)          | NO               |                                                                                              |
|            | Processing scrap recovery      | Germany             | 2001      | 97    | %    | Rombach & Friedrich (2001) | YES              |                                                                                              |
|            | Manufacturing scrap recovery   | EU                  | 2005      | 6     | %    | Boin & Bertram (2005)      | YES              | Obtained as the ratio of the scrap recovered from manufacturing to the total scrap generated |
|            | Processing downcycled scrap    | EU                  | 2005      | 0     | %    | Boin & Bertram (2005)      | YES              | The scrap generated is remelted in the same plant                                            |
|            | Manufacturing downcycled scrap | EU                  | 2005      | 0     | %    | Boin & Bertram (2005)      | YES              | The scrap generated is remelted in the same plant                                            |
|            | Export of products             | EU                  | 2019      | 10    | %    | Workman (2019)             | NO               |                                                                                              |
|            | Matrix D (cast alloys)         | Germany             | 2001      | 9.4   | %    | Rombach & Friedrich (2001) | YES              | Value reported per sector.                                                                   |
|            | Matrix D (wrought alloys)      | Germany             | 2001      | 8.6   | %    | Rombach & Friedrich (2001) | YES              | Value reported per sector.                                                                   |
| Use        | Initial material               | EU                  | 2018      | 3     | %    | Passarini et al. (2018)    | YES              | Reported value per sector                                                                    |
|            |                                | Japan               | 2005      | 12.4  | -    |                            | NO               | Value from construction machinery                                                            |
|            |                                | Japan               | 2005      | 14.7  | -    |                            | NO               | Value from food processing machinery                                                         |
|            | Weibull scale parameter        | Japan               | 2005      | 14.3  | -    | Nomura (2005)              | NO               | Value from printing and bookbinding machinery                                                |
|            |                                | Japan               | 2005      | 15.3  | -    |                            | NO               | Value from chemical machinery                                                                |
|            |                                | Japan               | 2005      | 10.4  | -    |                            | NO               | Value from semiconductor machinery                                                           |
|            |                                |                     |           |       |      |                            |                  |                                                                                              |

| Phase       | Parameter                                     | Data country/region | Data year | Value | Unit  | Reference                | Value per sector | Assumptions                                                              |
|-------------|-----------------------------------------------|---------------------|-----------|-------|-------|--------------------------|------------------|--------------------------------------------------------------------------|
|             | Weibull shape parameter                       | Japan               | 2005      | 14.2  | -     | Nomura (2005)            | NO               | Value from other service machinery                                       |
|             |                                               | Japan               | 2005      | 12.2  | -     |                          | NO               | Value from machinery service for industry                                |
|             |                                               | Japan               | 2005      | 15.7  | -     |                          | NO               | Value from wrapping and packaging machinery                              |
|             |                                               | Japan               | 2005      | 15.5  | -     |                          | NO               | Value from plastic processing machinery                                  |
|             |                                               | Japan               | 2005      | 1.39  | -     |                          | NO               | Value from construction machinery                                        |
|             |                                               | Japan               | 2005      | 1.68  | -     |                          | NO               | Value from food processing machinery                                     |
|             |                                               | Japan               | 2005      | 1.66  | -     |                          | NO               | Value from printing and bookbinding machinery                            |
|             |                                               | Japan               | 2005      | 1.36  | -     |                          | NO               | Value from chemical machinery                                            |
|             |                                               | Japan               | 2005      | 2.56  | -     |                          | NO               | Value from semiconductor machinery                                       |
|             |                                               | Japan               | 2005      | 1.54  | -     |                          | NO               | Value from other service machinery                                       |
|             |                                               | Japan               | 2005      | 1.86  | -     |                          | NO               | Value from machinery service for industry                                |
|             |                                               | Japan               | 2005      | 2.16  | -     |                          | NO               | Value from wrapping and packaging machinery                              |
|             | Lifetime                                      | EU                  | 2017      | 40    | years | Bertram et al. (2017)    | NO               |                                                                          |
|             |                                               | Japan               | 2012      | 15    | years | Hatamaya et al. (2012)   | YES              |                                                                          |
|             | Hoarding rate                                 | EU                  | 2020      | 36    | %     | Godoy León et al. (2020) | NO               | Value taken as proxy from hard metals (Cobalt)                           |
|             | Hoarding time                                 | EU                  | 2020      | 1     | years | Godoy León et al. (2020) | NO               | Value taken as proxy from hard metals (Cobalt)                           |
| End-of-life | Export of EoL products                        | EU                  | 2005      | 4.71  | %     | Boin & Bertram (2005)    | YES              | Calculated as ratio of exported scrap to total scrap generated in the EU |
|             | Collection-to-recycling rate                  | EU                  | 2020      | 80    | %     | Godoy León et al. (2020) | NO               | Value taken as proxy from hard metals (Cobalt)                           |
|             | Pre-treatment efficiency                      | Global              | 2012      | 97    | %     | Liu et al. (2012)        | YES              |                                                                          |
|             |                                               | EU                  | 2017      | 98    | %     | Bertram et al. (2017)    | YES              |                                                                          |
|             | Matrix B (refining)                           | EU                  | 2005      | 100   | %     | Boin & Bertram (2005)    | NO               |                                                                          |
|             | Matrix B (remelting)                          | EU                  | 2005      | 0     | %     | Boin & Bertram (2005)    | NO               |                                                                          |
|             | Recycling efficiency (remelting and refining) | EU                  | 2018      | 97    | %     | Passarini et al. (2018)  | YES              |                                                                          |

Table S10. Full data set of the application cables. It includes the assumptions made and a distinction when the value was reported per sector

| Phase      | Parameter                      | Data country/region | Data year | Value | Unit  | Reference                  | Value per sector | Assumptions                                                                                  |
|------------|--------------------------------|---------------------|-----------|-------|-------|----------------------------|------------------|----------------------------------------------------------------------------------------------|
| Production | Processing yield               | EU                  | 2018      | 70    | %     | Passarini et al. (2018)    | YES              |                                                                                              |
|            |                                | Germany             | 2001      | 85    | %     | Rombach & Friedrich (2001) | YES              |                                                                                              |
|            | Manufacturing yield            | Global              | 2012      | 90    | %     | Liu et al. (2012)          | NO               |                                                                                              |
|            | Processing scrap recovery      | Germany             | 2001      | 91    | %     | Rombach & Friedrich (2001) | YES              |                                                                                              |
|            | Manufacturing scrap recovery   | EU                  | 2005      | 3     | %     | Boin & Bertram (2005)      | YES              | Obtained as the ratio of the scrap recovered from manufacturing to the total scrap generated |
|            | Processing downcycled scrap    | EU                  | 2005      | 0     | %     | Boin & Bertram (2005)      | YES              | The scrap generated is remelted in the same plant                                            |
|            | Manufacturing downcycled scrap | EU                  | 2005      | 0     | %     | Boin & Bertram (2005)      | YES              | The scrap generated is remelted in the same plant                                            |
|            | Export of products             | EU                  | 2019      | 14    | %     | Workman (2019)             | NO               |                                                                                              |
|            | Matrix D (cast alloys)         | Germany             | 2001      | 2     | %     | Rombach & Friedrich (2001) | YES              | Value reported per sector.                                                                   |
|            | Matrix D (wrought alloys)      | Germany             | 2001      | 3.8   | %     | Rombach & Friedrich (2001) | YES              | Value reported per sector.                                                                   |
| Use        | Initial material               | EU                  | 2018      | 5     | %     | Passarini et al. (2018)    | YES              | Reported value per sector (10%), divided among the 2 applications.                           |
|            | Weibull scale parameter        | Japan               | 2005      | 10.7  | -     | Nomura (2005)              | YES              | Value from electric wire and cables                                                          |
|            | Weibull shape parameter        | Japan               | 2005      | 1.37  | -     | Nomura (2005)              | YES              | Value taken from electric wire and cables                                                    |
|            | Lifetime                       | EU                  | 2017      | 40    | years | Bertram et al. (2017)      | NO               |                                                                                              |
|            |                                | Japan               | 2012      | 17.5  | years | Hatamaya et al. (2012)     | YES              |                                                                                              |
|            | Hoarding rate                  | EU                  | 2020      | 51    | %     | Eurostat (2020)            | NO               | Proxy value taken from consumer durables application (assumed as WEE)                        |

| Phase       | Parameter                                     | Data country/region | Data year | Value | Unit  | Reference                | Value per sector | Assumptions                                                              |
|-------------|-----------------------------------------------|---------------------|-----------|-------|-------|--------------------------|------------------|--------------------------------------------------------------------------|
|             | Hoarding time                                 | EU                  | 2020      | 4     | years | Godoy León et al. (2020) | NO               | Value taken as proxy from portable batteries (Cobalt)                    |
|             | Export of EoL products                        | EU                  | 2005      | 4.71  | %     | Boin & Bertram (2005)    | YES              | Calculated as ratio of exported scrap to total scrap generated in the EU |
|             | Collection-to-recycling rate                  | EU                  | 2020      | 39    | %     | Eurostat (2020)          | NO               | Proxy value taken from consumer durables application (assumed as WEE)    |
| End-of-life | Pre-treatment efficiency                      | Global              | 2012      | 97    | %     | Liu et al. (2012)        | YES              |                                                                          |
|             |                                               | EU                  | 2017      | 98    | %     | Bertram et al. (2017)    | YES              |                                                                          |
|             | Matrix B (refining)                           | EU                  | 2005      | 91.1  | %     | Boin & Bertram (2005)    | NO               |                                                                          |
|             | Matrix B (remelting)                          | EU                  | 2005      | 8.9   | %     | Boin & Bertram (2005)    | NO               |                                                                          |
|             | Recycling efficiency (remelting and refining) | EU                  | 2018      | 97    | %     | Passarini et al. (2018)  | YES              |                                                                          |

Table S11. Full data set of the application other engineering. It includes the assumptions made and a distinction when the value was reported per sector

| Phase      | Parameter                      | Data country/region | Data year | Value | Unit | Reference                  | Value per sector | Assumptions                                                                                  |
|------------|--------------------------------|---------------------|-----------|-------|------|----------------------------|------------------|----------------------------------------------------------------------------------------------|
|            | Processing yield               | EU                  | 2018      | 70    | %    | Passarini et al. (2018)    | YES              |                                                                                              |
|            |                                | Germany             | 2001      | 85    | %    | Rombach & Friedrich (2001) | YES              |                                                                                              |
|            | Manufacturing yield            | Global              | 2012      | 80    | %    | Liu et al. (2012)          | NO               |                                                                                              |
|            | Processing scrap recovery      | Germany             | 2001      | 91    | %    | Rombach & Friedrich (2001) | YES              |                                                                                              |
| Production | Manufacturing scrap recovery   | EU                  | 2005      | 17    | %    | Boin & Bertram (2005)      | NO               | Obtained as the ratio of the scrap recovered from manufacturing to the total scrap generated |
|            | Processing downcycled scrap    | EU                  | 2005      | 0     | %    | Boin & Bertram (2005)      | YES              | The scrap generated is remelted in the same plant                                            |
|            | Manufacturing downcycled scrap | EU                  | 2005      | 0     | %    | Boin & Bertram (2005)      | YES              | The scrap generated is remelted in the same plant                                            |
|            | Export of products             | EU                  | 2019      | 14    | %    | Workman (2019)             | NO               |                                                                                              |

| Phase       | Parameter                                     | Data country/region | Data year | Value | Unit  | Reference                  | Value per sector | Assumptions                                                              |
|-------------|-----------------------------------------------|---------------------|-----------|-------|-------|----------------------------|------------------|--------------------------------------------------------------------------|
|             | Matrix D (cast alloys)                        | Germany             | 2001      | 9.4   | %     | Rombach & Friedrich (2001) | YES              | Value reported per sector.                                               |
|             | Matrix D (wrought alloys)                     | Germany             | 2001      | 8.6   | %     | Rombach & Friedrich (2001) | YES              | Value reported per sector.                                               |
| Use         | Initial material                              | EU                  | 2018      | 5     | %     | Passarini et al. (2018)    | YES              | Reported value per sector (10%), divided among the 2 applications.       |
|             | Weibull scale parameter                       | Japan               | 2005      | 10.7  | -     | Nomura (2005)              | NO               | Value taken from electric wire and cables                                |
|             | Weibull shape parameter                       | Japan               | 2005      | 1.37  | -     | Nomura (2005)              | NO               | Value taken from electric wire and cables                                |
|             | Lifetime                                      | EU                  | 2017      | 20    | years | Bertram et al. (2017)      | NO               |                                                                          |
|             |                                               | Japan               | 2012      | 17.5  | years | Hatamaya et al. (2012)     | YES              |                                                                          |
|             | Hoarding rate                                 | EU                  | 2020      | 51    | %     | Eurostat (2020)            | NO               | Proxy value taken from consumer durables application (assumed as WEE)    |
|             | Hoarding time                                 | EU                  | 2020      | 4     | years | Godoy León et al. (2020)   | NO               | Value taken as proxy from portable batteries (Cobalt)                    |
|             | Export of EoL products                        | EU                  | 2005      | 4.71  | %     | Boin & Bertram (2005)      | YES              | Calculated as ratio of exported scrap to total scrap generated in the EU |
| End-of-life | Collection-to-recycling rate                  | EU                  | 2020      | 39    | %     | Eurostat (2020)            | NO               | Proxy value taken from consumer durables application (assumed as WEE)    |
|             | Pre-treatment efficiency                      | Global              | 2012      | 97    | %     | Liu et al. (2012)          | YES              |                                                                          |
|             |                                               | EU                  | 2017      | 98    | %     | Bertram et al. (2017)      | YES              |                                                                          |
|             | Matrix B (refining)                           | EU                  | 2005      | 91.1  | %     | Boin & Bertram (2005)      | NO               |                                                                          |
|             | Matrix B (remelting)                          | EU                  | 2005      | 8.9   | %     | Boin & Bertram (2005)      | NO               |                                                                          |
|             | Recycling efficiency (remelting and refining) | EU                  | 2018      | 97    | %     | Passarini et al. (2018)    | YES              |                                                                          |

Table S12. Full data set of the application consumer durables. It includes the assumptions made and a distinction when the value was reported per sector

| Phase      | Parameter                      | Data country/region | Data year | Value | Unit | Reference                  | Value per sector | Assumptions                                                                                  |
|------------|--------------------------------|---------------------|-----------|-------|------|----------------------------|------------------|----------------------------------------------------------------------------------------------|
| Production | Processing yield               | EU                  | 2018      | 50    | %    | Passarini et al. (2018)    | YES              |                                                                                              |
|            |                                | Germany             | 2001      | 90    | %    | Rombach & Friedrich (2001) | YES              |                                                                                              |
|            | Manufacturing yield            | Global              | 2012      | 80    | %    | Liu et al. (2012)          | NO               |                                                                                              |
|            | Processing scrap recovery      | Germany             | 2001      | 94    | %    | Rombach & Friedrich (2001) | YES              |                                                                                              |
|            | Manufacturing scrap recovery   | EU                  | 2005      | 6     | %    | Boin & Bertram (2005)      | NO               | Obtained as the ratio of the scrap recovered from manufacturing to the total scrap generated |
|            | Processing downcycled scrap    | EU                  | 2005      | 0     | %    | Boin & Bertram (2005)      | YES              | The scrap generated is remelted in the same plant                                            |
|            | Manufacturing downcycled scrap | EU                  | 2005      | 0     | %    | Boin & Bertram (2005)      | YES              | The scrap generated is remelted in the same plant                                            |
|            | Export of products             | EU                  | 2019      | 14    | %    | Workman (2019)             | NO               |                                                                                              |
|            | Matrix D (cast alloys)         | Germany             | 2001      | 2     | %    | Rombach & Friedrich (2001) | YES              | Value reported per sector.                                                                   |
| Use        | Matrix D (wrought alloys)      | Germany             | 2001      | 5.5   | %    | Rombach & Friedrich (2001) | YES              | Value reported per sector.                                                                   |
|            | Initial material               | EU                  | 2018      | 6     | %    | Passarini et al. (2018)    | YES              | Reported value per sector                                                                    |
|            |                                | Japan               | 2005      | 11.4  | -    | Nomura (2005)              | NO               | Parameter considered as WEEE. Value from television and video equipment                      |
|            |                                | Japan               | 2005      | 15.5  | -    |                            | NO               | Parameter considered as WEEE. Value from air conditioners                                    |
|            |                                | Japan               | 2005      | 14.5  | -    |                            | NO               | Parameter considered as WEEE. Value from electric appliances for kitchen                     |
|            |                                | Japan               | 2005      | 14.1  | -    |                            | NO               | Parameter considered as WEEE. Value from electric lighting fixtures and apparatus            |
|            |                                | Japan               | 2005      | 8.1   | -    |                            | NO               | Parameter considered as WEEE. Value for personal computers                                   |
|            | Weibull scale parameter        |                     |           |       |      |                            |                  |                                                                                              |

| Phase       | Parameter               | Data country/region | Data year | Value | Unit  | Reference                | Value per sector | Assumptions                                                                       |
|-------------|-------------------------|---------------------|-----------|-------|-------|--------------------------|------------------|-----------------------------------------------------------------------------------|
|             | Weibull shape parameter | Japan               | 2005      | 10.4  | -     | (Nomura, 2005)           | NO               | Parameter considered as WEEE. Value from wired communication equipment            |
|             |                         | Japan               | 2005      | 10.8  | -     |                          | NO               | Parameter considered as WEEE. Value from wireless communication equipment         |
|             |                         | Japan               | 2005      | 12.7  | -     |                          | NO               | Parameter considered as WEEE. Value from applied electronic equipment             |
|             |                         | Japan               | 2005      | 1.2   | -     |                          | NO               | Parameter considered as WEEE. Value from television and video equipment           |
|             |                         | Japan               | 2005      | 1.76  | -     |                          | NO               | Parameter considered as WEEE. Value from air conditioners                         |
|             |                         | Japan               | 2005      | 1.53  | -     |                          | NO               | Parameter considered as WEEE. Value from electric appliances for kitchen          |
|             |                         | Japan               | 2005      | 1.45  | -     |                          | NO               | Parameter considered as WEEE. Value from electric lighting fixtures and apparatus |
|             |                         | Japan               | 2005      | 2.6   | -     |                          | NO               | Parameter considered as WEEE. Value for personal computers                        |
|             |                         | Japan               | 2005      | 1.63  | -     |                          | NO               | Parameter considered as WEEE. Value from wired communication equipment            |
|             |                         | Japan               | 2005      | 1.95  | -     |                          | NO               | Parameter considered as WEEE. Value from wireless communication equipment         |
|             |                         | Japan               | 2005      | 1.63  | -     |                          | NO               | Parameter considered as WEEE. Value from wireless communication equipment         |
|             |                         | Japan               | 2005      | 1.63  | -     |                          | NO               | Parameter considered as WEEE. Value from applied electronic equipment             |
|             | Lifetime                | EU                  | 2017      | 8     | years | Bertram et al. (2017)    | NO               |                                                                                   |
|             |                         | Japan               | 2012      | 10    | years | Hatamaya et al. (2012)   | YES              |                                                                                   |
|             | Hoarding rate           | EU                  | 2020      | 51    | %     | Eurostat (2020)          | NO               | Application assumed as WEEE                                                       |
|             | Hoarding time           | EU                  | 2020      | 4     | years | Godoy León et al. (2020) | NO               | Value taken as proxy from portable batteries (Cobalt)                             |
| End-of-life | Export of EoL products  | EU                  | 2005      | 4.71  | %     | Boin & Bertram (2005)    | YES              | Calculated as ratio of exported scrap to total scrap generated in the EU          |
|             |                         | EU                  | 2015      | 40    | %     | Huisman et al. (2017)    | NO               |                                                                                   |

| Phase | Parameter                                     | Data country/region | Data year | Value | Unit | Reference               | Value per sector | Assumptions                 |
|-------|-----------------------------------------------|---------------------|-----------|-------|------|-------------------------|------------------|-----------------------------|
|       | Collection-to-recycling rate                  | EU                  | 2020      | 39    | %    | Eurostat (2020)         | NO               | Application assumed as WEEE |
|       | Pre-treatment efficiency                      | Global              | 2012      | 97    | %    | Liu et al. (2012)       | YES              |                             |
|       |                                               | EU                  | 2017      | 98    | %    | Bertram et al. (2017)   | YES              |                             |
|       | Matrix B (refining)                           | EU                  | 2005      | 100   | %    | Boin & Bertram (2005)   | NO               |                             |
|       | Matrix B (remelting)                          | EU                  | 2005      | 0     | %    | Boin & Bertram (2005)   | NO               |                             |
|       | Recycling efficiency (remelting and refining) | EU                  | 2018      | 97    | %    | Passarini et al. (2018) | YES              |                             |

Table S13. Full data set of the application others. It includes the assumptions made and a distinction when the value was reported per sector

| Phase      | Parameter                      | Data country/region | Data year | Value | Unit | Reference                  | Value per sector | Assumptions                                                                                  |
|------------|--------------------------------|---------------------|-----------|-------|------|----------------------------|------------------|----------------------------------------------------------------------------------------------|
|            |                                | EU                  | 2018      | 30    | %    | Passarini et al. (2018)    | YES              |                                                                                              |
|            | Processing yield               | Germany             | 2001      | 80    | %    | Rombach & Friedrich (2001) | YES              |                                                                                              |
|            | Manufacturing yield            | Global              | 2012      | 80    | %    | Liu et al. (2012)          | NO               |                                                                                              |
|            | Processing scrap recovery      | Germany             | 2001      | 92    | %    | Rombach & Friedrich (2001) | YES              |                                                                                              |
| Production | Manufacturing scrap recovery   | EU                  | 2005      | 6     | %    | Boin & Bertram (2005)      | NO               | Obtained as the ratio of the scrap recovered from manufacturing to the total scrap generated |
|            | Processing downcycled scrap    | EU                  | 2005      | 0     | %    | Boin & Bertram (2005)      | YES              | The scrap generated is remelted in the same plant                                            |
|            | Manufacturing downcycled scrap | EU                  | 2005      | 0     | %    | Boin & Bertram (2005)      | YES              | The scrap generated is remelted in the same plant                                            |
|            | Export of products             | EU                  | 2019      | 14    | %    | Workman (2019)             | NO               |                                                                                              |
|            | Matrix D (cast alloys)         | Germany             | 2001      | 3     | %    | Rombach & Friedrich (2001) | YES              | Value reported per sector.                                                                   |



| Phase       | Parameter                                     | Data country/region | Data year | Value | Unit  | Reference                  | Value per sector | Assumptions                                                              |
|-------------|-----------------------------------------------|---------------------|-----------|-------|-------|----------------------------|------------------|--------------------------------------------------------------------------|
|             | Matrix D (wrought alloys)                     | Germany             | 2001      | 1.4   | %     | Rombach & Friedrich (2001) | YES              | Value reported per sector.                                               |
| Use         | Initial material                              | EU                  | 2018      | 5     | %     | Passarini et al. (2018)    | YES              | Reported value per sector. Includes the share of dissipative uses (3%)   |
|             | Weibull scale parameter                       | Japan               | 2005      | 13.50 | -     | Nomura (2005)              | NO               | Value taken from other metallic uses                                     |
|             | Weibull shape parameter                       | Japan               | 2005      | 1.52  | -     | Nomura (2005)              | NO               | Value taken from other metallic uses                                     |
|             | Lifetime                                      | EU                  | 2017      | 20    | years | Bertram et al. (2017)      | NO               |                                                                          |
|             |                                               | Japan               | 2012      | 10    | years | Hatamaya et al. (2012)     | YES              |                                                                          |
|             | Hoarding rate                                 | EU                  | 2020      | 50    | %     | Godoy León et al. (2020)   | NO               | Proxy value from other metals (Cobalt)                                   |
|             | Hoarding time                                 | EU                  | 2020      | 5     | years | Godoy León et al. (2020)   | NO               | Proxy value from other metals (Cobalt)                                   |
|             | Export of EoL products                        | EU                  | 2005      | 4.71  | %     | Boin & Bertram (2005)      | YES              | Calculated as ratio of exported scrap to total scrap generated in the EU |
| End-of-life | Collection-to-recycling rate                  | Japan               | 2007      | 30    | %     | Hatamaya et al. (2007)     | YES              |                                                                          |
|             |                                               | Germany             | 2001      | 24    | %     | Rombach & Friedrich (2001) | YES              |                                                                          |
|             | Pre-treatment efficiency                      | Global              | 2012      | 97    | %     | Liu et al. (2012)          | YES              |                                                                          |
|             |                                               | EU                  | 2017      | 98    | %     | Bertram et al. (2017)      | YES              |                                                                          |
|             | Matrix B (refining)                           | EU                  | 2005      | 100   | %     | Boin & Bertram (2005)      | NO               |                                                                          |
|             | Matrix B (remelting)                          | EU                  | 2005      | 0     | %     | Boin & Bertram (2005)      | NO               |                                                                          |
|             | Recycling efficiency (remelting and refining) | EU                  | 2018      | 97    | %     | Passarini et al. (2018)    | YES              |                                                                          |

#### 4. Data Inventory and uncertainty

During the literature research, more than 90 sources were consulted for the collection of data related to aluminium. In total, 320 values were acquired from 20 sources. These values are related mainly to aluminium flows occurring in the EU and corresponds to 45% of the total data collected. Thirteen percent of the obtained values belong to single member countries of the EU; 8% of the values belong to global aluminium studies and 34% belong to other countries (outside the EU), mostly Japan. The values from Japanese sources are mainly related to the Weibull distribution. Regarding the temporal representation, 38% of the data cover the last 10 years (2010-2020), and 62% consists of older data (2000-2010).

Regarding the communication format more than 81% of the data collected come from scientific papers, 11% was acquired from official reports. The consulted reports correspond to reports commissioned by governmental institutions such as the Joint Research Centre (JRC) of the European Commission or the European Aluminium Association (EAA). The remaining data (8%) were obtained from websites and for the European Statistical System (Eurostat).

Despite the reliability of the sources consulted to obtain the data to run the model, the data is susceptible to uncertainties **Fuente especificada no válida..**

For instance, the geographical, temporal and technological variation can result in values with lower accuracy **Fuente especificada no válida..** In this study, more than 60% of the collected data belong to the period 2000-2010. Some of the key parameters to run the model such as matrix B and matrix D belong to this group. In addition, the averaging of reviewed values is another source of uncertainty (Williams et al., 2009).

The way in which the data is reported can also lead to uncertainties. For instance, Godoy León & Dewulf **Fuente especificada no válida.** indicate that lifetime and hoarding time values can be overlapped and no distinction between these values is specified in the sources. The authors also point out the connection between the percentages of hoarding, collection and disposal and the lack of data of processes that happen between these processes e.g., reuse, refurbish or unidentified streams.

The final outcome of the data inventory was a complete dataset of aluminium. Nevertheless, as stated in previous paragraphs, it highly depended on the availability of information. Data gaps and parameters with multiple values were found during the process, requiring assumptions, average and proxy values to be considered.

The final values to run the model are shown in **Error! Reference source not found..** In green are shown the average values, in orange the assumed values, in yellow the proxy values and in white those that did not need any kind of treatment. The complete dataset per product category and all the values collected is shown in the Supplementary Material.

Table S14. Final values used to run the model. Average values are shown in green, assumed values are shown in orange, proxy values are shown in yellow and values with no treatment are shown in white. AUT: automobiles, AE: aerospace, OTT: other transport, R: residential buildings, NR: non-residential buildings, UBC: used beverage cans, MPA: mixed packaging, MAE: machinery and equipment, CA: cables, OTE: other engineering, CD: consumer durables, OT: others

[illegible]

[illegible]

## 5. Supplementary results

### Case scenario S1

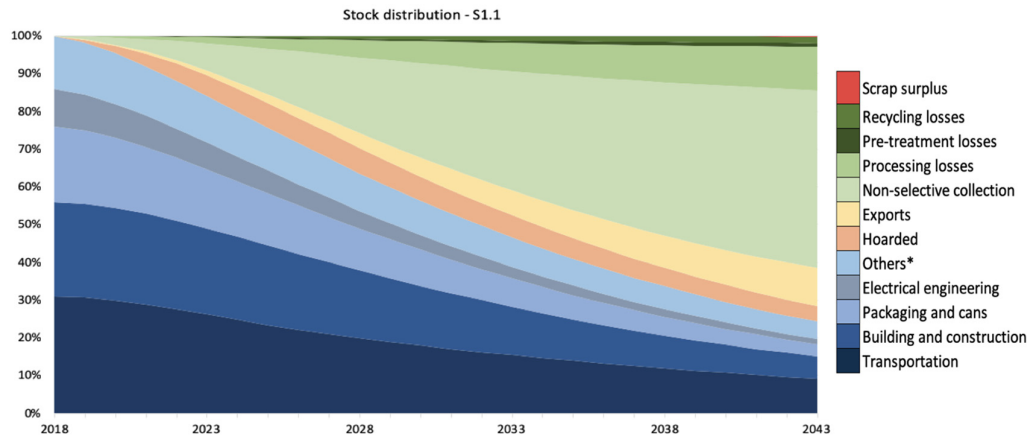

Figure S1. Evolution of the stock composition of aluminium in products and its associated losses – Scenario S1.1

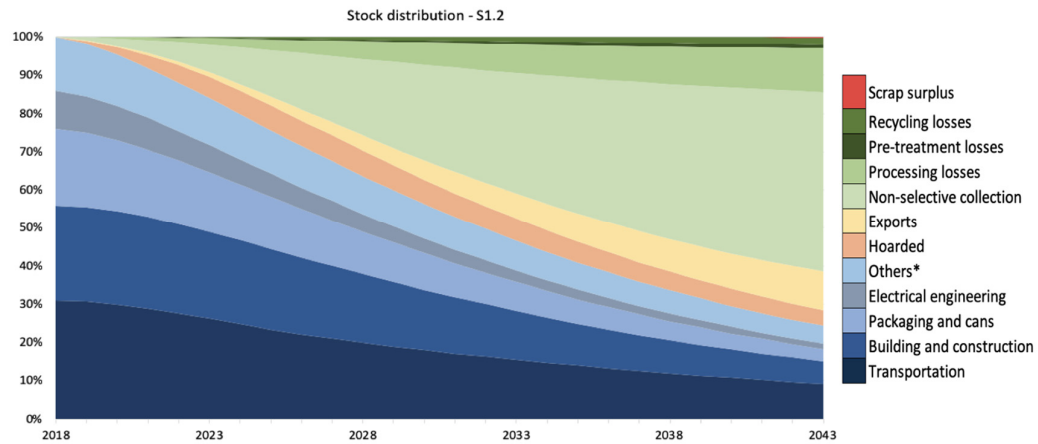

Figure S2. Evolution of the stock composition of aluminium in products and its associated losses – Scenario S1.2

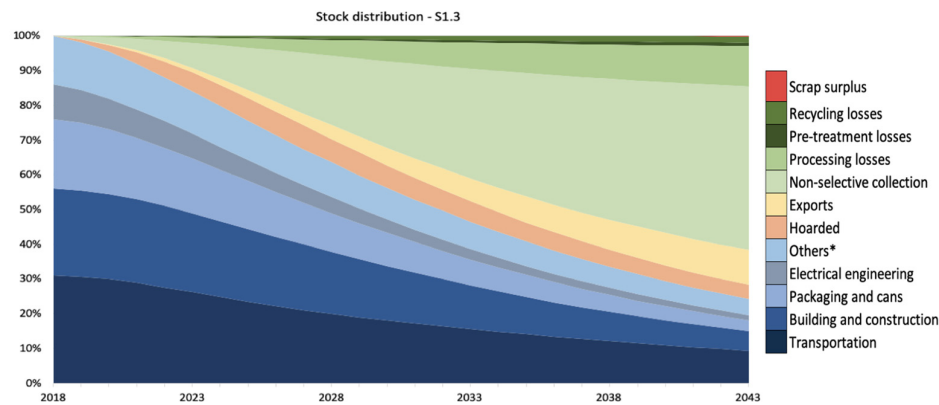

Figure S1. Evolution of the stock composition of aluminium in products and its associated losses – Scenario S1.3

Case scenario S2

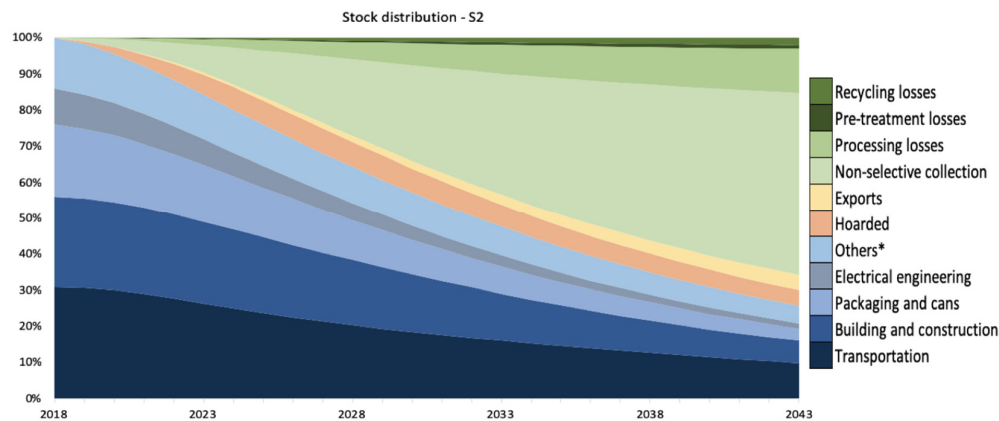

Figure S2. Evolution of the stock composition of aluminium in products and its associated losses – Scenario S2

Case scenario S3

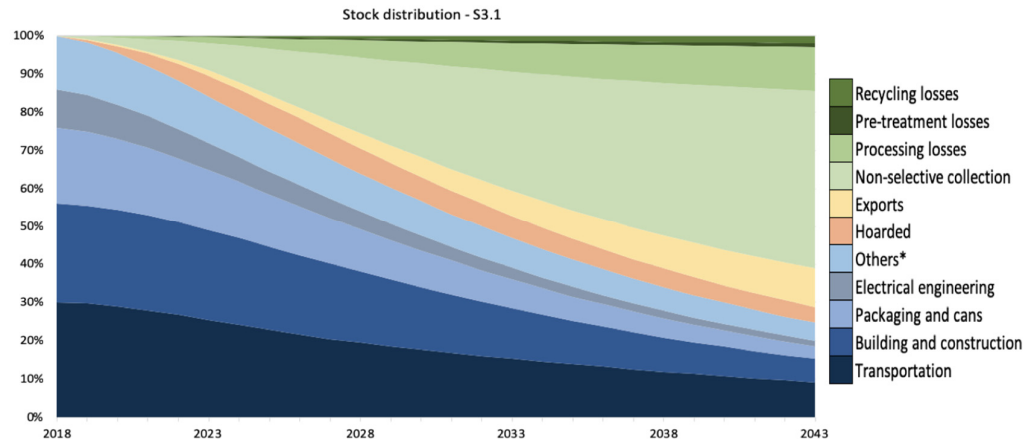

Figure S3. Evolution of the stock composition of aluminium in products and its associated losses – Scenario S3.1

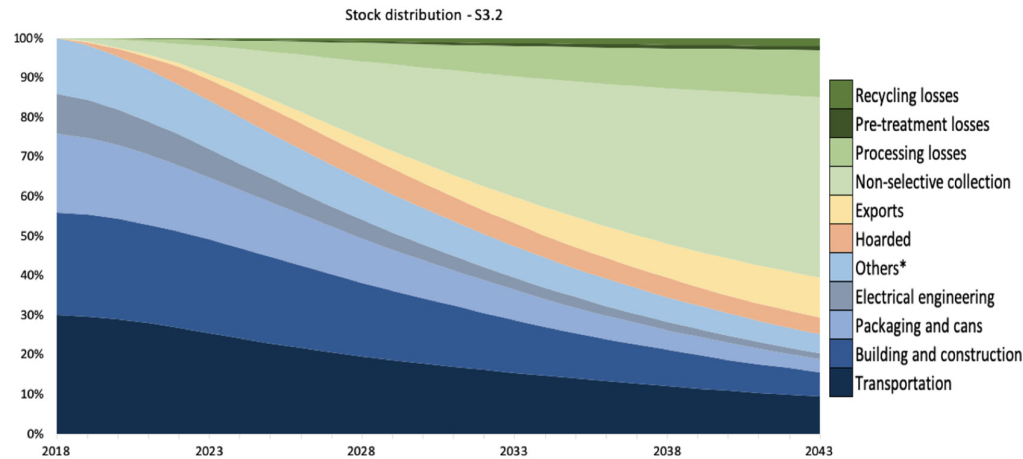

Figure S4. Evolution of the stock composition of aluminium in products and its associated losses – Scenario S3.2

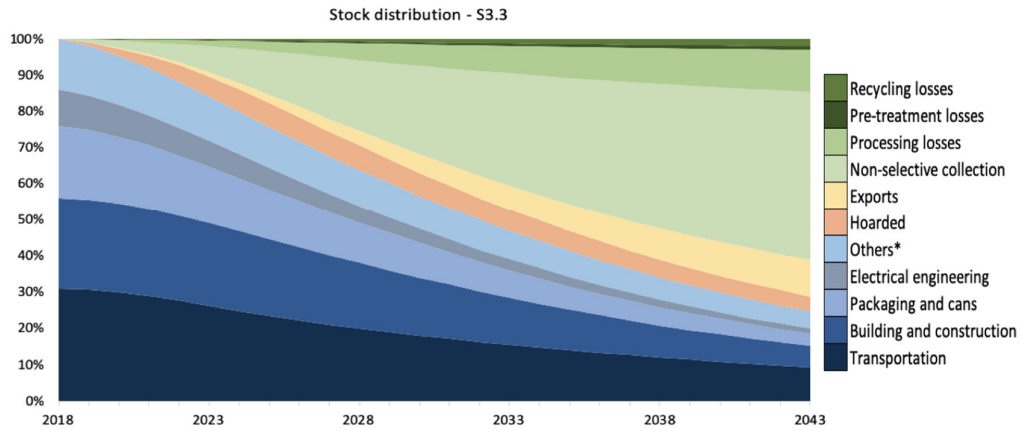

Figure S5. Evolution of the stock composition of aluminium in products and its associated losses – Scenario S3.3

#### Case scenario S4

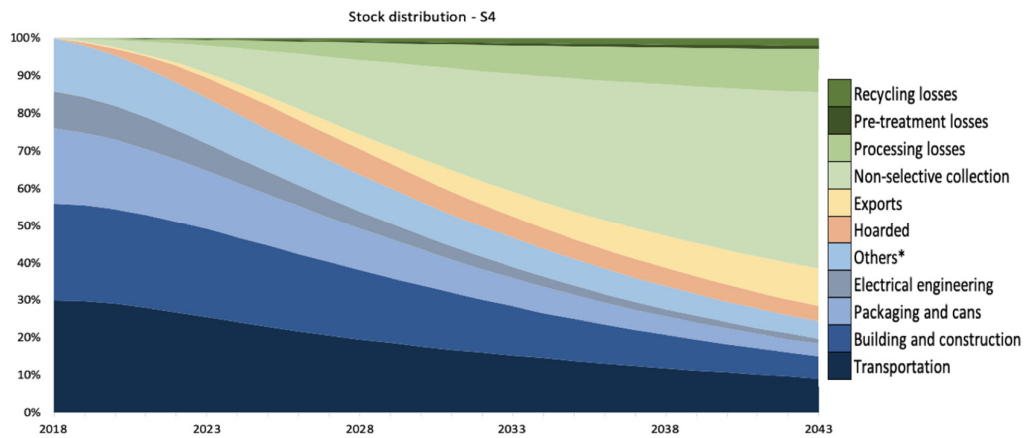

Figure S6. Evolution of the stock composition of aluminium in products and its associated losses – Scenario S4

#### Case scenario S5

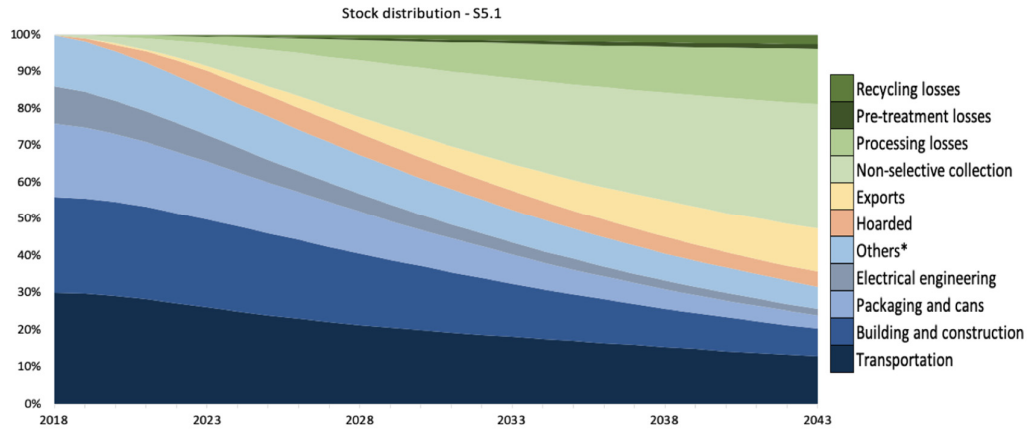

Figure S7. Evolution of the stock composition of aluminium in products and its associated losses – Scenario S5.1

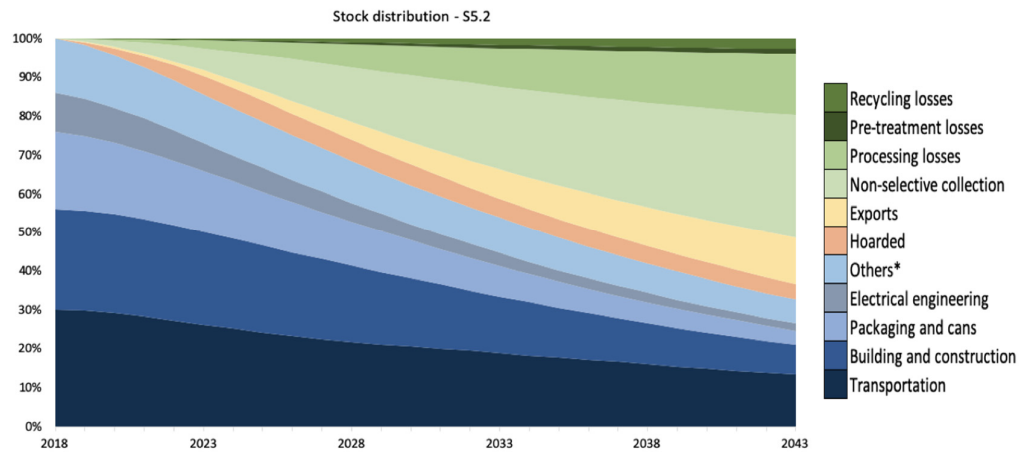

Figure S8. Evolution of the stock composition of aluminium in products and its associated losses – Scenario S5.2

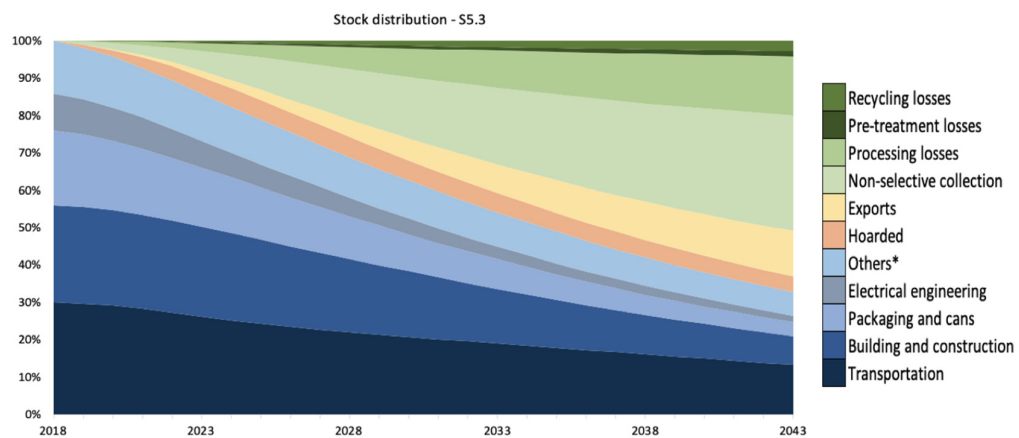

Figure S9. Evolution of the stock composition of aluminium in products and its associated losses – Scenario S5.3



## 6. References

- Boin, U. & Bertram, M., 2005. Melting standardized aluminum scrap: A mass balance model for Europe. *JOM*, pp. 26-33.
- Godoy Leon, M. & Dewulf, J., 2020. Data quality assessment framework for critical raw materials. the case of Cobalt. *Resources, Conservation and Recycling*, Volumen 157.
- Lai, C., Murthy, D. & Xie, M., 2006. Weibull Distributions and their applications. In: *Springer Handbook of Engineering Statistics*. London: Springer, pp. 63-78.
- Licari, J. & Swanson, D., 2005. Reliability prediction and modelling. In: Elsevier, ed. *Adhesives Technology for Electronic Applications*. s.l.:Waltham.
- Maxfield, M., 2008. *Abandoned vehicles*, s.l.: COPS.
- Nomura, K., 2005. Duration of Assets: Examination of Directly Observed Discard Data in Japan. *Keio Economic Observatory*, Volumen 99.
- Passarini, F., Ciacci, L., Nuss, P. & Manfredi, S., 2018. *Material Flow Analysis of Aluminium, Copper, and Iron in the EU-28*, Brussels: Joint Research Centre - European Commission.
- Wilson, G. et al., 2017. The hibernation mobile phone: Dead storage as a barrier to efficient electronic waste recovery. *Waste Management*, Volume 60, pp. 521-533.
